# Supplementary material for: Revealing the Specific Regulations of Brassinolide on Tomato Fruit Chilling Injury by Integrated Multi-Omics
Source: Front Nutr. 2021 Dec 3;8:769715. doi: 10.3389/fnut.2021.769715 (PMC8681340; doi:10.3389/fnut.2021.769715)
Supplement: Supplementary file 4 [file Table_4.XLSX]

## Sheet: CK_8d.vs.CK_0d_all_KEGG_
MapID	MapTitle	Pvalue	x	y	n	N	EnrichDirect	MetaIDs	kegg_cpd_id
map00600	Sphingolipid metabolism	0.0607735	1	1	11	181	Over	L-Serine	cpd:C00065
map00061	Fatty acid biosynthesis	0.118171	1	2	11	181	Over	Oleic acid	cpd:C00712
map00073	Cutin, suberine and wax biosynthesis	0.118171	1	2	11	181	Over	Oleic acid	cpd:C00712
map00261	Monobactam biosynthesis	0.118171	1	2	11	181	Over	L-Serine	cpd:C00065
map00562	Inositol phosphate metabolism	0.118171	1	2	11	181	Over	D-Glucose 6-phosphate	cpd:C00092
map01502	Vancomycin resistance	0.118171	1	2	11	181	Over	L-Serine	cpd:C00065
map00340	Histidine metabolism	0.172361	1	3	11	181	Over	1-Methylhistidine	cpd:C01152
map01040	Biosynthesis of unsaturated fatty acids	0.172361	1	3	11	181	Over	Oleic acid	cpd:C00712
map00564	Glycerophospholipid metabolism	0.223507	1	4	11	181	Over	Diethanolamine	cpd:C06772
map00920	Sulfur metabolism	0.223507	1	4	11	181	Over	L-Serine	cpd:C00065
map00460	Cyanoamino acid metabolism	0.271764	1	5	11	181	Over	L-Serine	cpd:C00065
map00750	Vitamin B6 metabolism	0.271764	1	5	11	181	Over	Pyridoxine	cpd:C00314
map00908	Zeatin biosynthesis	0.271764	1	5	11	181	Over	Adenine	cpd:C00147
map00053	Ascorbate and aldarate metabolism	0.317279	1	6	11	181	Over	D-Galacturonic acid	cpd:C00333
map00500	Starch and sucrose metabolism	0.317279	1	6	11	181	Over	D-Glucose 6-phosphate	cpd:C00092
map00630	Glyoxylate and dicarboxylate metabolism	0.40064	1	8	11	181	Over	L-Serine	cpd:C00065
map00040	Pentose and glucuronate interconversions	0.43875	1	9	11	181	Over	D-Galacturonic acid	cpd:C00333
map00260	Glycine, serine and threonine metabolism	0.43875	1	9	11	181	Over	L-Serine	cpd:C00065
map00270	Cysteine and methionine metabolism	0.43875	1	9	11	181	Over	L-Serine	cpd:C00065
map00360	Phenylalanine metabolism	0.43875	1	9	11	181	Over	Benzoylformic Acid	cpd:C02137
map00520	Amino sugar and nucleotide sugar metabolism	0.43875	1	9	11	181	Over	D-Galacturonic acid	cpd:C00333
map00970	Aminoacyl-tRNA biosynthesis	0.474644	1	10	11	181	Over	L-Serine	cpd:C00065
map01200	Carbon metabolism	0.57017	1	13	11	181	Over	L-Serine	cpd:C00065
map02010	ABC transporters	0.651012	2	25	11	181	Over	D-Galacturonic acid, L-Serine	cpd:C00333,cpd:C00065
map00230	Purine metabolism	1	1	16	11	181	Over	Adenine	cpd:C00147
map00330	Arginine and proline metabolism	1	1	15	11	181	Over	Feruloylputrescine	cpd:C10497
